# Supplementary material for: Implications of miR-148a-3p/p35/PTEN signaling in tau hyperphosphorylation and autoregulatory feedforward of Akt/CREB in Alzheimer’s disease
Source: PubMed Central journal article supplement — Mol Ther Nucleic Acids. 2021 Nov 29;27:256–75. doi: 10.1016/j.omtn.2021.11.019 (PMC8714918; doi:10.1016/j.omtn.2021.11.019), 2021-11-29
Supplement: mmc1.pdf [file mmc1.pdf]

OMTN, Volume 27

## **Supplemental information**

### **Implications of miR-148a-3p/p35/PTEN signaling in tau hyperphosphorylation and autoregulatory feedforward of Akt/CREB in Alzheimer's disease**

**Li Zeng, Hailun Jiang, Ghulam Md Ashraf, Jiangong Liu, Linlin Wang, Kaiyue Zhao, Mimin Liu, Zhuorong Li, and Rui Liu**

**Supplementary Table 1.** List of downregulated miRNAs in the cortex of APP/PS1 mice at different disease stages compared with age-matched WT controls obtained by high-throughput sequencing analysis.

|                    | 1-month-old APP/PS1 mice versus WT control |        |        | 3-month-old APP/PS1 mice versus WT control |        |        | 6-month-old APP/PS1 mice versus WT control |        |        | 9-month-old APP/PS1 mice versus WT control |        |        |
|--------------------|--------------------------------------------|--------|--------|--------------------------------------------|--------|--------|--------------------------------------------|--------|--------|--------------------------------------------|--------|--------|
|                    | 1                                          | 2      | 3      | 1                                          | 2      | 3      | 1                                          | 2      | 3      | 1                                          | 2      | 3      |
| <b>miR-148a-3p</b> | 20.74                                      | 23.92  | 27.1   | 16.03                                      | 16.62  | 16.47  | 18.51                                      | 20.77  | 16.2   | 15.66                                      | 21.1   | 18.33  |
| <b>miR-10a-5p</b>  | 36.67                                      | 35.53  | 29.97  | 42.02                                      | 34.17  | 35.58  | 70.21                                      | 119.84 | 61.51  | 171.43                                     | 144.53 | 93.66  |
| <b>miR-144-3p</b>  | 397.72                                     | 274.3  | 258.69 | 293.64                                     | 186.61 | 169.01 | 275.52                                     | 137.5  | 211.6  | 25.92                                      | 65.72  | 103.83 |
| <b>miR-144-5p</b>  | 24.98                                      | 16.7   | 13.6   | 13.48                                      | 10.44  | 6.02   | 15.35                                      | 11.31  | 12.43  | 2.08                                       | 3.05   | 3.29   |
| <b>miR-706</b>     | 0.16                                       | 0      | 0.22   | 0                                          | 0.08   | 0      | 0.33                                       | 0      | 0.94   | 0.55                                       | 0      | 0.43   |
| <b>miR-451a</b>    | 307.24                                     | 218.96 | 207.15 | 251.13                                     | 176.26 | 150.75 | 338.44                                     | 256.77 | 195.71 | 31.6                                       | 51.74  | 107.98 |
| <b>miR-7651-5p</b> | 0.08                                       | 0.85   | 1      | 0.29                                       | 0.17   | 0.63   | 0.22                                       | 0.57   | 0.63   | 0                                          | 0.25   | 0.14   |
| <b>miR-190b-3p</b> | 0.08                                       | 0.42   | 0.22   | 0.2                                        | 0      | 0      | 0.44                                       | 0      | 0.16   | 0                                          | 0.25   | 0.14   |
| <b>miR-3093-3p</b> | 0.56                                       | 0.85   | 0.77   | 0.39                                       | 0.75   | 0.63   | 1.09                                       | 1.13   | 1.42   | 0.42                                       | 1.4    | 1.29   |
| <b>miR-361-5p</b>  | 0.24                                       | 0.28   | 0.33   | 0.1                                        | 0.33   | 0.42   | 0.54                                       | 0.42   | 0.16   | 0.42                                       | 0.51   | 0.57   |
| <b>miR-6966-5p</b> | 0.08                                       | 0      | 0.11   | 0                                          | 0.25   | 0      | 0.54                                       | 0.28   | 0.31   | 0.55                                       | 0      | 0.29   |
| <b>miR-1960</b>    | 0.16                                       | 0.28   | 0.11   | 0                                          | 0      | 0.11   | 0.65                                       | 0.42   | 0.47   | 0.14                                       | 0      | 0      |

**Supplementary Table 2.** Predicted miR-148a-3p targets obtained from TargetScan, miRDB, and Tarbase with SVR and PhastCons scores by miRanda database.

| Target gene    | SVR score        | PhastCons score |
|----------------|------------------|-----------------|
| <b>CDK5R1</b>  | -0.1732, -1.1160 | 0.6726, 0.7310  |
| <b>PTEN</b>    | -0.8271, -1.1250 | 0.7479, 0.8259  |
| <b>RAB14</b>   | -0.6152          | 0.7585          |
| <b>CCT6A</b>   | -1.2625          | 0.5446          |
| <b>KLF6</b>    | -0.6231, -0.2811 | 0.7672, 0.5823  |
| <b>NRP1</b>    | -1.3151          | 0.8190          |
| <b>RASSF8</b>  | /                | /               |
| <b>DSTYK</b>   | /                | /               |
| <b>SESTD1</b>  | -0.4249          | 0.7870          |
| <b>STARD13</b> | -1.0885          | 0.6333          |
| <b>RNF219</b>  | -1.1764, -0.1473 | 0.7210, 0.7876  |
| <b>MET</b>     | -0.6736          | 0.7518          |
| <b>DICER1</b>  | -1.0661          | 0.6992          |
| <b>BMP3</b>    | -0.4221          | 0.5468          |
| <b>DNMT1</b>   | -1.0394          | 0.5812          |
| <b>LDLR</b>    | -0.6683, -0.3894 | 0.5086, 0.5129  |
| <b>MTMR9</b>   | -0.1911, -0.3442 | 0.6080, 0.6620  |
| <b>ARL6IP1</b> | -1.1916          | 0.6270          |
| <b>TNRC6A</b>  | -1.0862          | 0.6934          |
| <b>TNRC6B</b>  | /                | /               |
| <b>PRNP</b>    | -0.7594          | 0.6691          |

|                 |                                             |                                |
|-----------------|---------------------------------------------|--------------------------------|
| <b>USP38</b>    | -0.4790                                     | 0.6421                         |
| <b>NPTX1</b>    | -0.6437                                     | 0.6847                         |
| <b>MAP3K4</b>   | -0.9967                                     | 0.6347                         |
| <b>QKI</b>      | -0.8427                                     | 0.7996                         |
| <b>INO80</b>    | -0.4482, -0.8962                            | 0.6178, 0.6178                 |
| <b>PHACTR2</b>  | /                                           | /                              |
| <b>ALCAM</b>    | -0.7482                                     | 0.6758                         |
| <b>BCL2L1</b>   | -1.0531                                     | 0.8164                         |
| <b>TGIF2</b>    | /                                           | /                              |
| <b>YWHAB</b>    | -1.3163                                     | 0.6428                         |
| <b>FXR1</b>     | -1.3371                                     | 0.7250                         |
| <b>ZFYVE26</b>  | -0.5147, -1.1036                            | 0.5476, 0.6386                 |
| <b>MAP3K9</b>   | -0.8604                                     | 0.5968                         |
| <b>RPS6KA5</b>  | -0.0467, -1.0577, -0.1758, -0.8790, -1.1316 | 0.6114, 0.6956, 0.6500, 0.6500 |
| <b>TGFB2</b>    | -1.1434                                     | 0.6894                         |
| <b>LBR</b>      | -0.6630                                     | 0.4498                         |
| <b>CDKN1B</b>   | -0.2472                                     | 0.6546                         |
| <b>DYRK1A</b>   | -0.0207, -0.2277                            | 0.6207, 0.7089                 |
| <b>DYNLL2</b>   | -0.5181                                     | 0.6807                         |
| <b>SH3PXD2A</b> | -0.0028, -0.005, -0.002                     | 0.6362, 0.5135, 0.5511         |

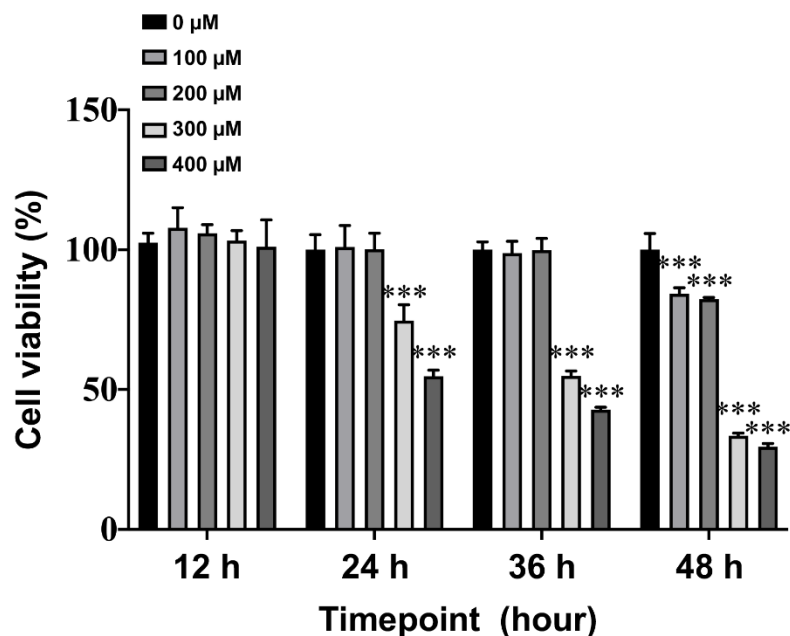

**Supplementary Figure 1. Cytotoxicity of copper in APP<sup>swe</sup> cells.** Results represent means  $\pm$  SEM.

$n = 3$ . \*\*\* $P < 0.001$  vs. 0  $\mu$ M copper at 12 h.

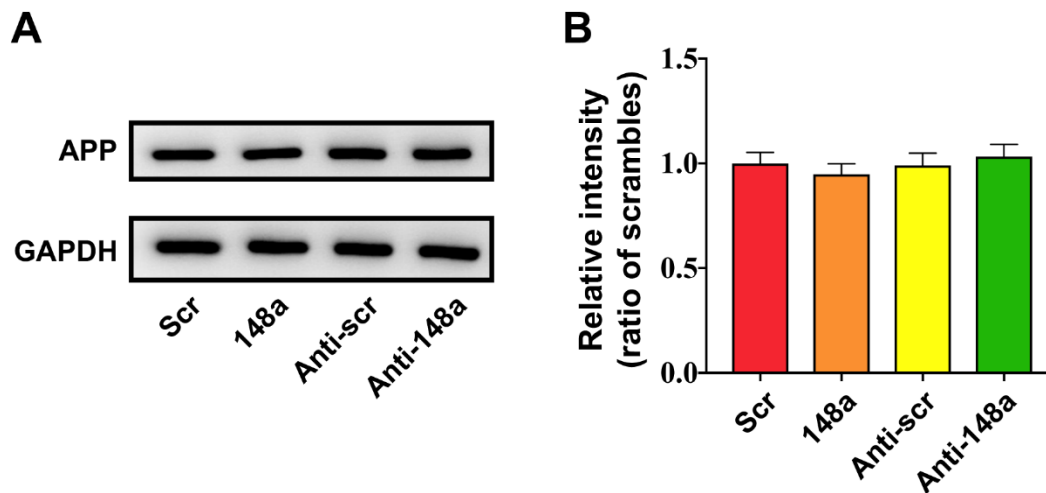

**Supplementary Figure 2. Unchanged APP expression in APPsw cells after transfection with miR-148a-3p mimics and anti-miR-148a-3p.** Results represent means  $\pm$  SEM.  $n = 4$ . Abbr.: 148a, miR-148a-3p mimics; Anti-148a, anti-miR-148a-3p; Scr, scrambled control; Anti-scr, anti-scrambled control.

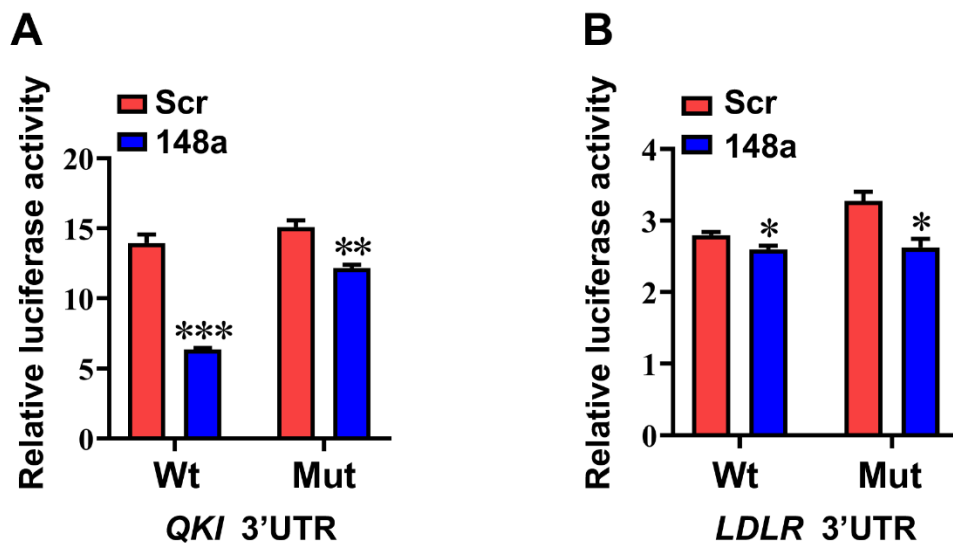

**Supplementary Figure 3. Dual-luciferase reporter assay in HEK293 cells transfected with wide-type (WT) 3'-UTR or mutant (MUT) 3'-UTR reporter of *QKI* (A) and *LDLR* (B) together with miR-23b-3p mimics (148a) or scrambled control (Scr).** Results indicated that the predicted genes *QKI* and *LDLR* were not specific targets of miR-148a-3p. Results represent means  $\pm$  SEM,  $n = 5$ . \* $P < 0.05$ , \*\* $P < 0.01$ , \*\*\* $P < 0.001$  vs. Scr.

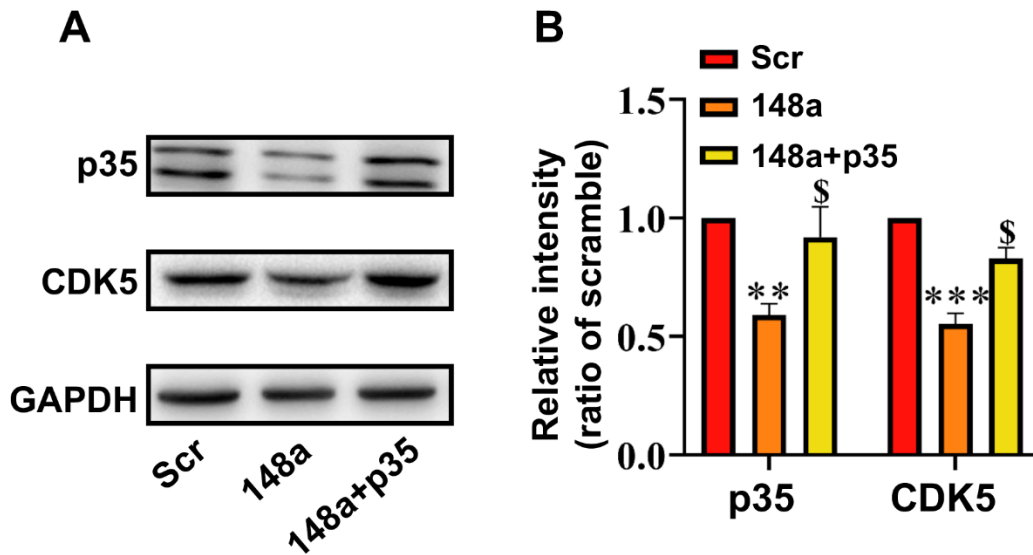

**Supplementary Figure 4.** Expression of p35 and CDK5 in APPswe cells transfected with scrambled control (Scr), miR-148a-3p mimics (148a) and p35 overexpressing plasmid (p35). Representative Western blot images of p35 and CDK5 (A) and qualification of expression of p35 and CDK5 (B). Results represent mean  $\pm$  SEM,  $n = 4$ . \*\* $P < 0.01$ , \*\*\* $P < 0.001$  vs. Scr. \$ $P < 0.05$  vs. 148a.

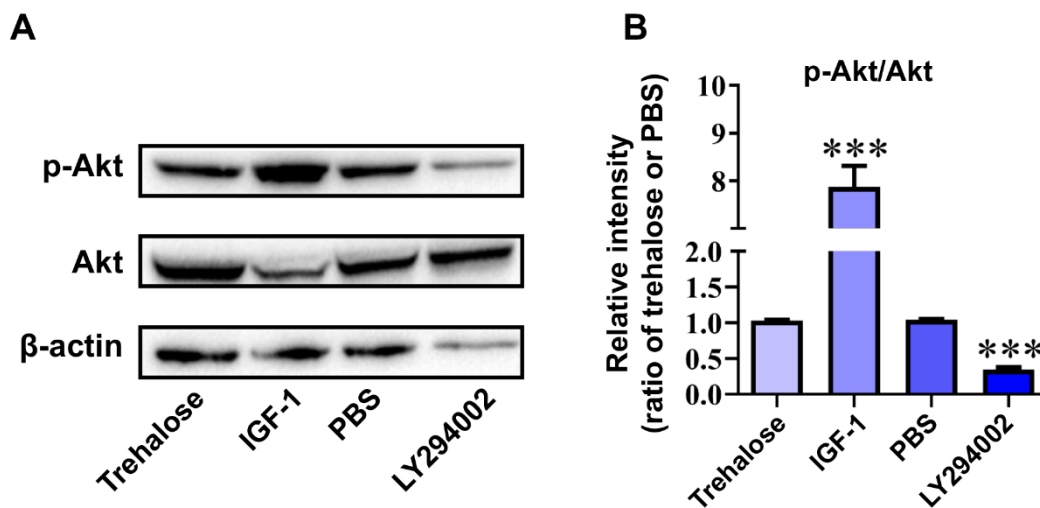

**Supplementary Figure 5.** Expression of p-Akt and Akt in APPswe cells subjected to the stimulus of Akt by IGF and inhibition of PI3K by LY294002. Representative Western blot images of p-Akt and Akt (A) and qualification of ratio of p-Akt/Akt (B). Results represent means  $\pm$  SEM,  $n = 4$ . \*\*\* $P < 0.001$  vs. trehalose/PBS.

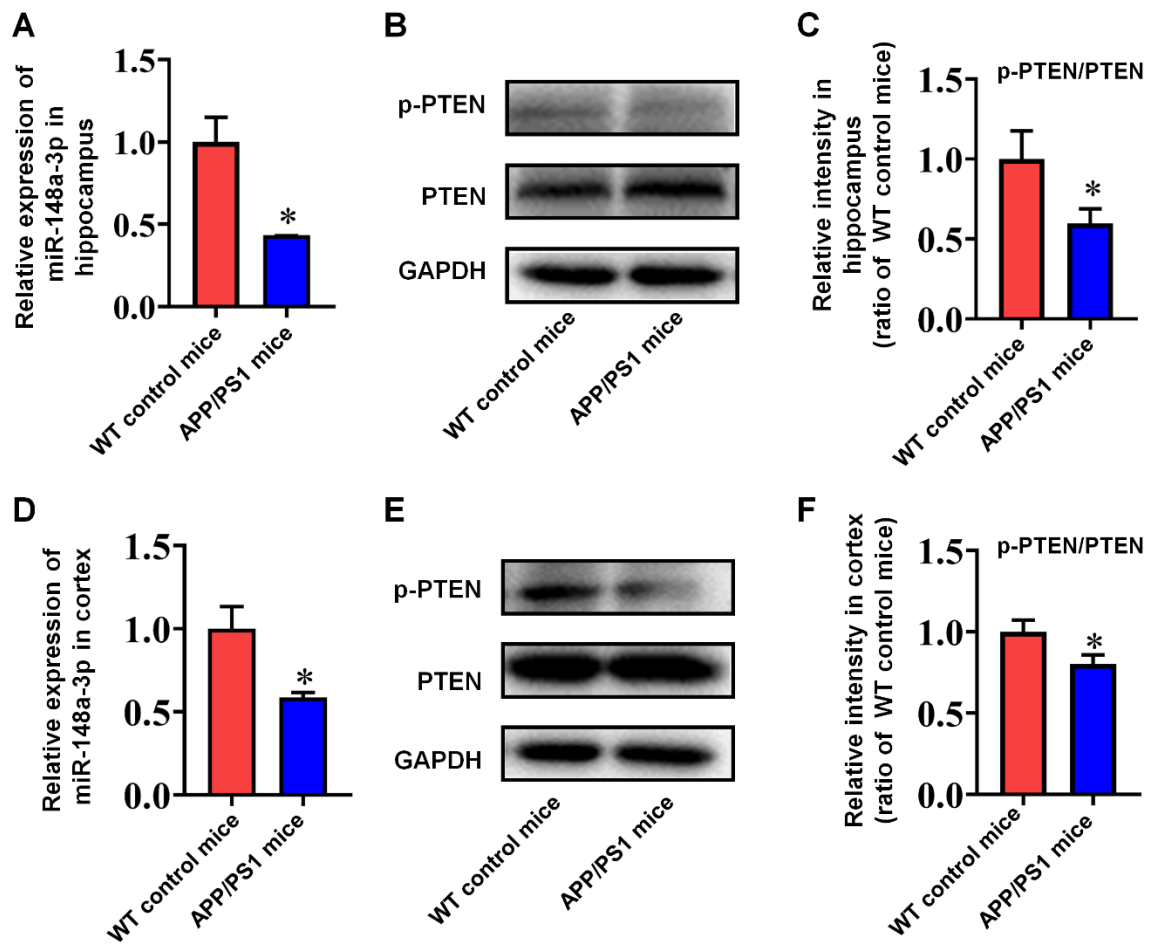

**Supplementary Figure 6. Expression of miR-148a-3p and PTEN in the hippocampus and cortex of APP/PS1 mice.** (A) Decreased level of miR-148a-3p in the hippocampus of APP/PS1 mice. (B,C) Representative Western blot images of p-PTEN and PTEN (B) and qualification of decreased ratio of p-PTEN/PTEN (C) in the hippocampus of APP/PS1 mice. (D) Decreased level of miR-148a-3p in the cortex of APP/PS1 mice. (E,F) Representative Western blot images of p-PTEN and PTEN (E) and qualification of decreased ratio of p-PTEN/PTEN (F) in the cortex of APP/PS1 mice. Results represent means  $\pm$  SEM,  $n = 4$ . \* $P < 0.05$  vs. WT control mice.
